# Supplementary material for: The combined effects of cholesteryl ester transfer protein (CETP) TaqIB gene polymorphism and canola, sesame and sesame-canola oils consumption on metabolic response in patients with diabetes and healthy people
Source: PubMed Central journal article supplement (PMC7581849; doi:10.34172/jcvtr.2020.32), 2020-08-02
Supplement: jcvtr-12-185-s001.pdf [file jcvtr-12-185-s001.pdf]

## Supplementary file 1

**Table S1.** Baseline characteristics of type 2 diabetic and healthy people according to the *CETP* TaqIB genotypes<sup>1</sup>

|                              | Type 2 diabetes |                |                | <i>P</i> | Healthy        |               |                | <i>P</i> |
|------------------------------|-----------------|----------------|----------------|----------|----------------|---------------|----------------|----------|
|                              | B1B1            | B1B2           | B2B2           |          | B1B1           | B1B2          | B2B2           |          |
| <b>Number, F</b>             | 18, 11          | 58, 28         | 19, 10         | 0.632    | 10, 5          | 47, 27        | 16, 9          | 0.911    |
| <b>Age, y</b>                | 48.32 (1.63)    | 49.24 (0.90)   | 49.80 (1.58)   | 0.805    | 45.16 (2.58)   | 47.77 (1.19)  | 47.88 (2.04)   | 0.641    |
| <b>Weight, kg</b>            | 77.14 (2.74)    | 76.68 (1.52)   | 76.59 (2.66)   | 0.987    | 72.39 (3.84)   | 76.61 (1.76)  | 72.74 (3.02)   | 0.406    |
| <b>BMI, kg/m<sup>2</sup></b> | 29.46 (0.87)    | 28.99 (0.48)   | 28.24 (0.85)   | 0.600    | 27.45 (1.45)   | 28.90 (0.66)  | 26.67 (1.13)   | 0.213    |
| <b>WC, cm</b>                | 101.14 (2.12)   | 101.12 (1.17)  | 100.59 (2.06)  | 0.974    | 96.68 (3.37)   | 100.27 (1.54) | 97.02 (2.65)   | 0.433    |
| <b>Visceral fat, %</b>       | 10.78 (0.71)    | 10.68 (0.39)   | 10.58 (0.69)   | 0.979    | 9.21 (0.95)    | 9.66 (0.44)   | 8.24 (0.75)    | 0.276    |
| <b>Body fat, %</b>           | 34.91 (1.31)    | 33.87 (0.73)   | 32.02 (1.27)   | 0.275    | 33.48 (1.78)   | 34.67 (0.83)  | 31.44 (1.39)   | 0.145    |
| <b>Muscle mass, %</b>        | 29.19 (0.58)    | 29.77 (0.32)   | 30.13 (0.57)   | 0.518    | 29.49 (0.78)   | 29.13 (0.36)  | 30.25 (0.61)   | 0.304    |
| <b>SBP, mmHg</b>             | 9.88 (0.31)     | 10.50 (0.17)   | 10.27 (0.30)   | 0.225    | 10.34 (1.55)   | 10.16 (0.71)  | 12.67 (1.22)   | 0.207    |
| <b>DBP, mmHg</b>             | 7.02 (0.26)     | 7.49 (0.14)    | 7.26 (0.25)    | 0.278    | 7.31 (0.34)    | 7.23 (0.15)   | 7.30 (0.27)    | 0.958    |
| <b>TC, mg/dl</b>             | 159.66 (7.37)   | 161.40 (4.09)  | 162.28 (7.15)  | 0.966    | 177.19 (10.97) | 182.07 (5.03) | 181.79 (8.61)  | 0.920    |
| <b>HDL-C, mg/dl</b>          | 36.24 (2.46)    | 38.44 (1.36)   | 39.09 (2.38)   | 0.672    | 42.01 (3.29)   | 41.37 (1.50)  | 44.24 (2.58)   | 0.635    |
| <b>LDL-C, mg/dl</b>          | 80.77 (4.36)    | 80.97 (2.42)   | 79.87 (4.22)   | 0.975    | 90.63 (7.12)   | 93.70 (3.26)  | 93.29 (5.59)   | 0.926    |
| <b>TG, mg/dl</b>             | 161.70 (18.04)  | 152.69 (10.01) | 159.41 (17.49) | 0.885    | 122.52 (18.71) | 139.93 (8.58) | 140.90 (14.70) | 0.682    |
| <b>Lp(a), mg/dl</b>          | 22.61 (6.01)    | 24.01 (3.20)   | 19.06 (5.49)   | 0.739    | 19.62 (7.14)   | 24.96 (3.10)  | 29.67 (5.49)   | 0.533    |
| <b>LDL: HDL</b>              | 2.49 (0.33)     | 2.46 (0.18)    | 2.23 (0.32)    | 0.808    | 2.37 (0.52)    | 2.63 (0.24)   | 2.15 (0.41)    | 0.596    |
| <b>TC: HDL</b>               | 4.98 (0.69)     | 4.93 (0.38)    | 4.52 (0.67)    | 0.851    | 4.60 (1.15)    | 5.16 (0.52)   | 4.19 (0.90)    | 0.630    |
| <b>TG: HDL</b>               | 5.63 (1.48)     | 5.52 (0.82)    | 4.76 (1.44)    | 0.885    | 3.59 (2.61)    | 5.01 (1.20)   | 3.32 (2.05)    | 0.733    |
| <b>ApoB, mg/dl</b>           | 107.46 (7.98)   | 93.03 (4.43)   | 88.04 (7.73)   | 0.186    | 102.73 (10.88) | 105.38 (4.99) | 98.61 (8.55)   | 0.790    |
| <b>ApoA-1, mg/dl</b>         | 149.78 (5.95)   | 150.65 (3.30)  | 158.73 (5.77)  | 0.438    | 149.30 (8.22)  | 159.76 (3.77) | 167.29 (6.46)  | 0.235    |
| <b>ApoB: ApoA-1</b>          | 0.73 (0.06)     | 0.63 (0.03)    | 0.57 (0.06)    | 0.168    | 0.69 (0.07)    | 0.67 (0.03)   | 0.59 (0.06)    | 0.448    |
| <b>FBG, mg/dl</b>            | 112.14 (6.63)   | 115.04 (3.68)  | 120.34 (6.42)  | 0.658    | 87.32 (3.84)   | 88.27 (1.76)  | 85.10 (3.01)   | 0.664    |

|                        |                |               |                |       |                |               |                |       |
|------------------------|----------------|---------------|----------------|-------|----------------|---------------|----------------|-------|
| <b>Insulin, mIU/ml</b> | 31.08 (5.07)   | 29.20 (2.68)  | 23.60 (4.89)   | 0.518 | 22.71 (3.92)   | 24.95 (1.92)  | 22.38 (3.18)   | 0.738 |
| <b>HOMA-IR</b>         | 3.94 (0.60)    | 3.76 (0.32)   | 2.96 (0.56)    | 0.407 | 2.80 (0.45)    | 3.08 (0.22)   | 2.73 (0.36)    | 0.663 |
| <b>QUICKI</b>          | 0.29 (0.006)   | 0.29 (0.003)  | 0.29 (0.006)   | 0.942 | 0.30 (0.007)   | 0.30 (0.003)  | 0.31 (0.005)   | 0.542 |
| <b>ALP, U/L</b>        | 173.94 (10.94) | 182.47 (6.07) | 206.62 (10.61) | 0.075 | 182.52 (13.56) | 186.68 (6.22) | 173.22 (10.66) | 0.554 |
| <b>GGT, U/L</b>        | 29.11 (3.38)   | 29.43 (1.88)  | 27.98 (3.28)   | 0.929 | 23.76 (4.06)   | 25.72 (1.86)  | 17.90 (3.19)   | 0.114 |
| <b>AST, U/L</b>        | 22.40 (2.87)   | 23.70 (1.59)  | 25.08 (2.78)   | 0.799 | 21.41 (3.12)   | 24.99 (1.43)  | 19.07 (2.45)   | 0.103 |
| <b>ALT, U/L</b>        | 24.64 (3.86)   | 26.97 (2.14)  | 25.66 (3.74)   | 0.857 | 18.73 (4.22)   | 22.75 (1.93)  | 16.35 (3.32)   | 0.225 |

<sup>1</sup>All data are presented as mean (standard error), age and gender adjusted values. The comparisons were done using one-way analysis of variance (ANOVA). ApoA-1, apolipoprotein A-1; ApoB, apolipoprotein B; ALP, alkaline phosphatase; AST, aspartate aminotransferase; ALT, alanine aminotransferase, BMI, body mass index; DBP, diastolic blood pressure; FBG, fasting blood glucose; GGT, gamma-glutamyltransferase; HDL-C, High-density lipoprotein cholesterol; HOMA-IR, homeostasis model assessment for insulin resistance; LDL-C, Low-density lipoprotein cholesterol; Lp(a), lipoprotein a; QUICKI, quantitative insulin sensitivity check index; SBP, Systolic blood pressure; TC, total cholesterol; TG, Triglyceride; WC, waist circumference.

**Table S2.** Total energy, nutrient intakes and physical activity of patients with type 2 diabetes and healthy people according to each treatment period<sup>1</sup>

|                          | Type 2 diabetes (n = 95) |                          |                          | <i>P</i> | Healthy (n = 73)         |                          |                          | <i>P</i> |
|--------------------------|--------------------------|--------------------------|--------------------------|----------|--------------------------|--------------------------|--------------------------|----------|
|                          | Sesame oil               | Sesame-Canola oil        | Canola oil               |          | Sesame oil               | Sesame-Canola oil        | Canola oil               |          |
| <b>Energy (Kcal/day)</b> | 1764.42 (37.61)          | 1805.77 (37.65)          | 1768.20 (37.70)          | 0.298    | 1795.55 (47.27)          | 1843.35 (47.49)          | 1817.51 (47.33)          | 0.341    |
| <b>Carbohydrate (%E)</b> | 58.95 (0.60)             | 59.55 (0.60)             | 59.04 (0.60)             | 0.635    | 58.91 (0.62)             | 60.44 (0.62)             | 59.50 (0.62)             | 0.118    |
| <b>Protein (%E)</b>      | 15.48 (0.20)             | 15.38 (0.20)             | 15.49 (0.20)             | 0.856    | 14.89 (0.24)             | 14.98 (0.24)             | 14.83 (0.24)             | 0.856    |
| <b>Total Fat (%E)</b>    | 27.21 (0.50)             | 26.63 (0.50)             | 27.18 (0.49)             | 0.488    | 27.78 (0.54)             | 26.27 (0.54)             | 27.28 (0.54)             | 0.054    |
| <b>SFA (%E)</b>          | 7.93 (0.17)              | 7.73 (0.17)              | 7.80 (0.17)              | 0.638    | 8.27 (0.22) <sup>a</sup> | 7.66 (0.22) <sup>b</sup> | 7.80 (0.22)              | 0.044    |
| <b>MUFA (%E)</b>         | 8.46 (0.20) <sup>a</sup> | 9.06 (0.20) <sup>b</sup> | 9.75 (0.20) <sup>c</sup> | <0.001   | 8.85 (0.22) <sup>a</sup> | 8.91 (0.22) <sup>a</sup> | 9.63 (0.22) <sup>b</sup> | 0.002    |
| <b>PUFA (%E)</b>         | 6.25 (0.21) <sup>a</sup> | 5.34 (0.20) <sup>b</sup> | 5.60 (0.20) <sup>b</sup> | 0.001    | 6.15 (0.23) <sup>a</sup> | 5.18 (0.23) <sup>b</sup> | 5.31 (0.22) <sup>b</sup> | 0.004    |
| <b>PA (MET-min/day)</b>  | 2182.69 (26.56)          | 2144.98 (26.58)          | 2182.88 (26.70)          | 0.190    | 2185.52±30.60            | 2187.71 (31.24)          | 2150.93 (30.54)          | 0.238    |

<sup>1</sup>All data are presented as mean (standard error). The comparisons were done using linear mixed models (<sup>a,b,c</sup> values with different superscripts are statistically significant). SFA, saturated fat; MUFA, mono unsaturated fatty acid; PUFA, poly unsaturated fatty acid; PA, physical activity; MET, metabolic equivalent.
